# Supplementary material for: A unified framework for herbivore-to-producer biomass ratio reveals the relative influence of four ecological factors
Source: PubMed Central journal article supplement (PMC7794211; doi:10.1038/s42003-020-01587-9), 2021-01-08
Supplement: 42003_2020_1587_MOESM2_ESM.pdf [file 42003_2020_1587_MOESM2_ESM.pdf]

Supplementary information

**A unified framework for herbivore-to-producer biomass ratio reveals the relative influence of four ecological factors**

Takehiro Kazama, Jotaro Urabe\*, Masato Yamamichi, Kotaro Tokita, Xuwang Yin, Izumi Katano, Hideyuki Doi, Takehito Yoshida and Nelson G. Hairston Jr.

\* author for correspondence: [urabe@tohoku.ac.jp](mailto:urabe@tohoku.ac.jp)

Supplementary Figure 1

Supplementary Figure 2

Supplementary Figure 3

Supplementary Figure 4

Supplementary Figure 5

Supplementary Figure 6

Supplementary Figure 7

Supplementary Figure 8

Supplementary Figure 9

Supplementary Table 1

Supplementary Table 2

Supplementary Table 3

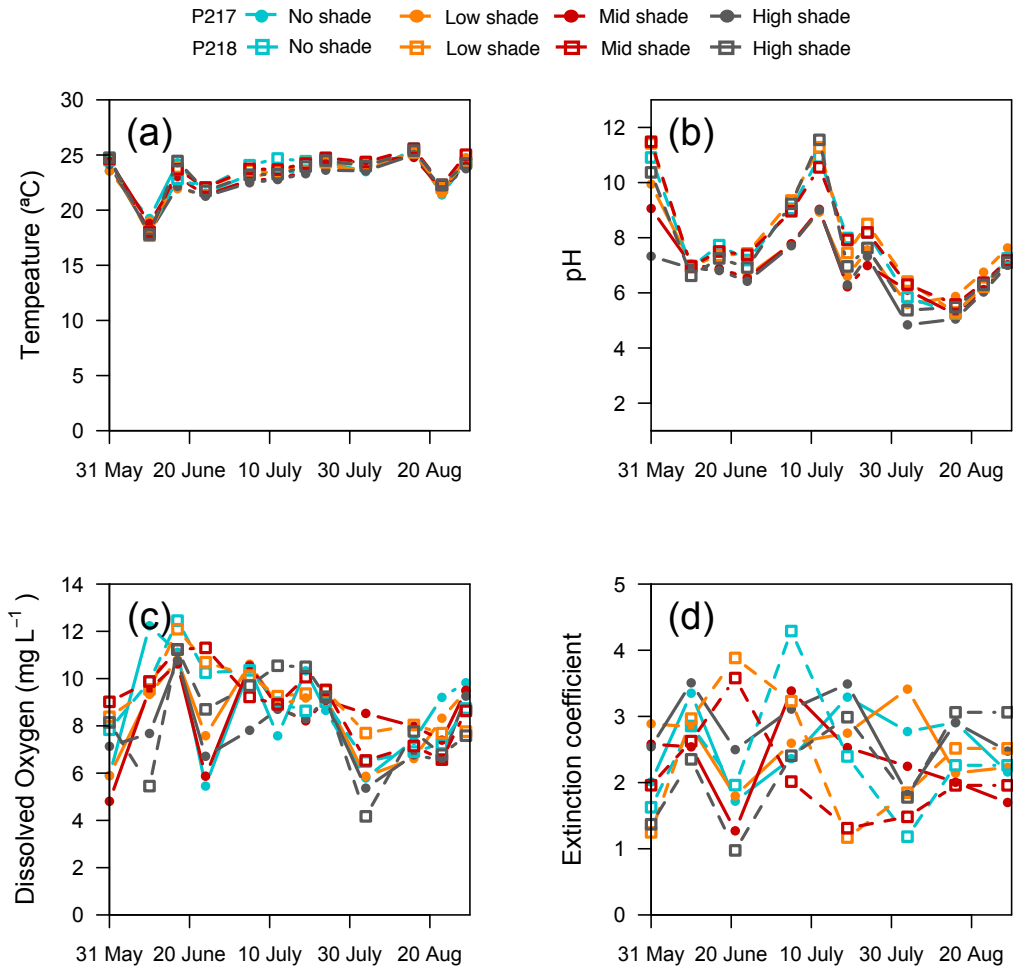

**Supplementary Figure 1.** Temporal changes in mean water temperature (a), pH (b), and dissolved oxygen (c) in the water column, and extinction coefficient ( $\text{m}^{-1}$ ) (d) in the no-shade (blue), low-shade (orange), mid-shade (red), and high-shade sections (gray) of pond 217 (circle and solid line) and pond 218 (square and dashed line).

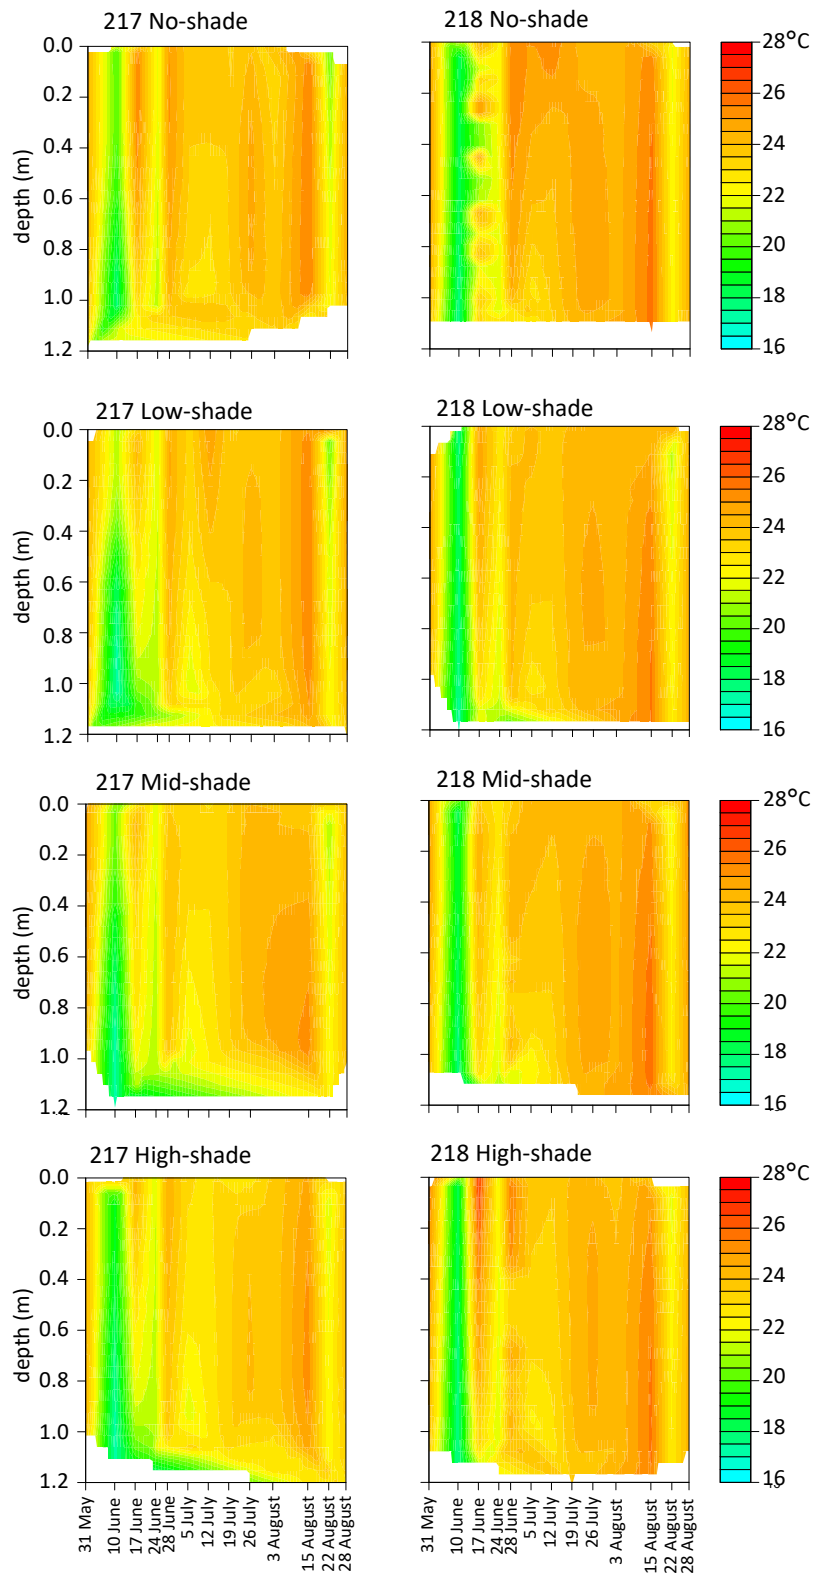

**Supplementary Figure 2.** Vertical profiles of water temperature in the no-shade (upper), low-shade (mid-upper), mid-shade (mid-lower), and high-shade sections (lower) of pond 217 (left) and pond 218 (right).

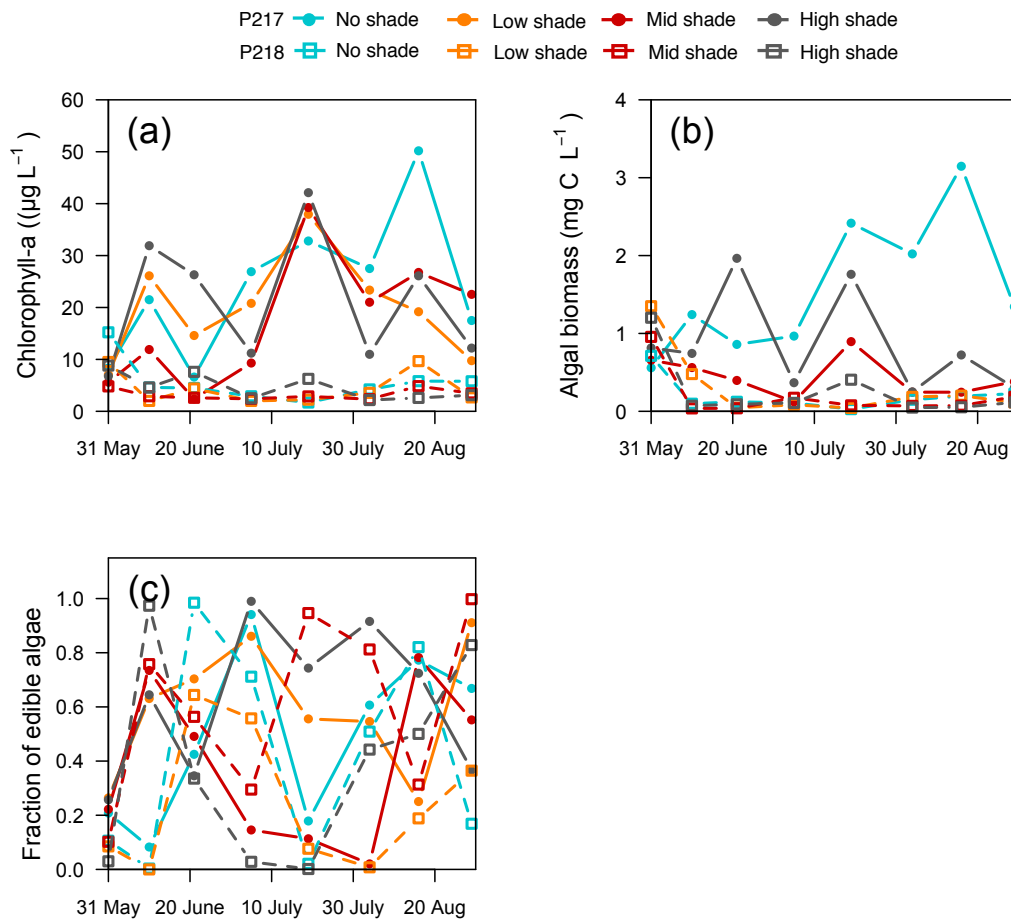

**Supplementary Figure 3.** Temporal changes in chlorophyll *a* (a), phytoplankton biomass (b), and fraction of edible phytoplankton (c) in the water column of no-shade (blue), low-shade (orange), mid-shade (red), and high-shade sections (gray) of pond 217 (circle and solid line) and pond 218 (square and dashed line).

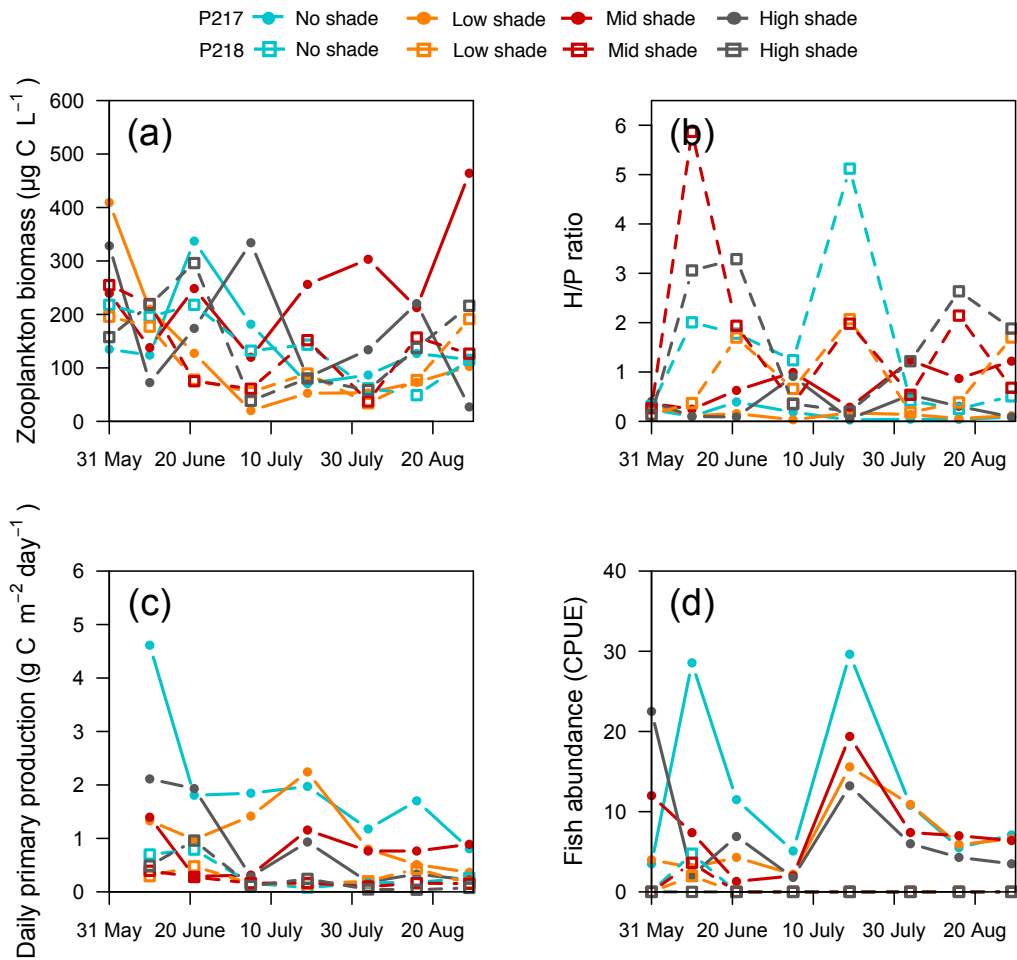

**Supplementary Figure 4.** Temporal changes in zooplankton biomass (a), *H/P* biomass ratio (b) daily production rate (c), and fish abundance (d) in the water column of no-shade (blue), low-shade (orange), mid-shade (red), and high-shade sections (gray) of pond 217 (circle and solid line) and pond 218 (square and dashed line).

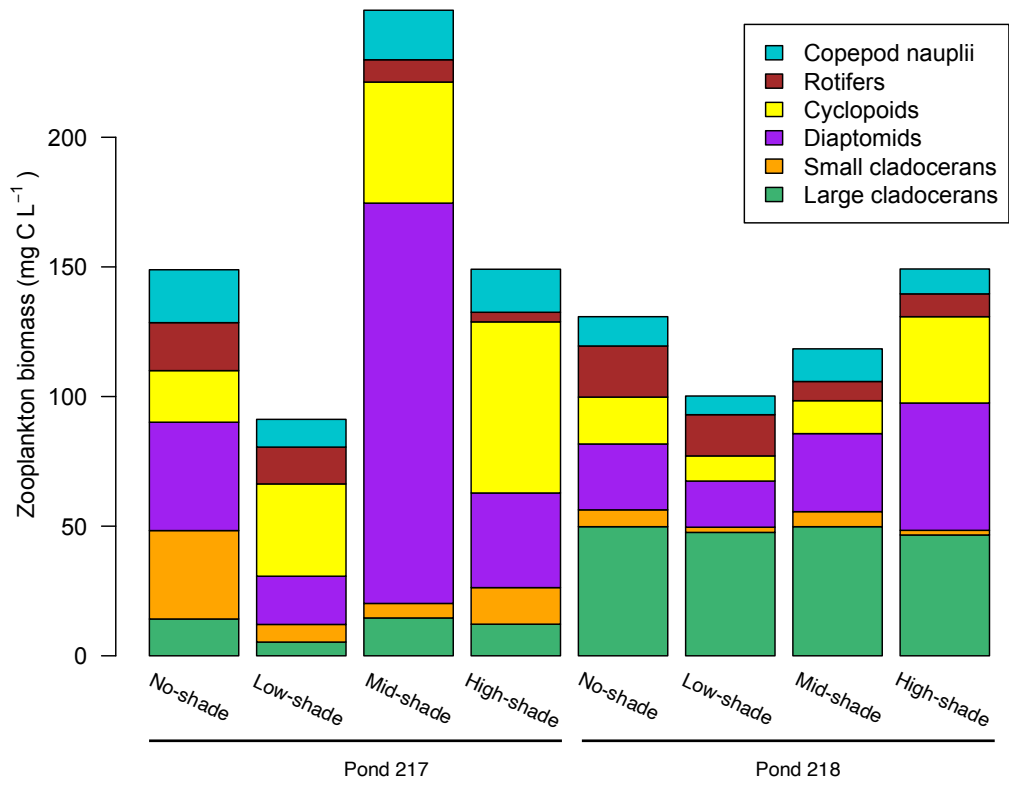

**Supplementary Figure 5.** Mean biomasses of zooplankton taxa during the experimental run in the no-shade, low-shade, mid-shade, and high-shade sections of pond 217 and pond 218.

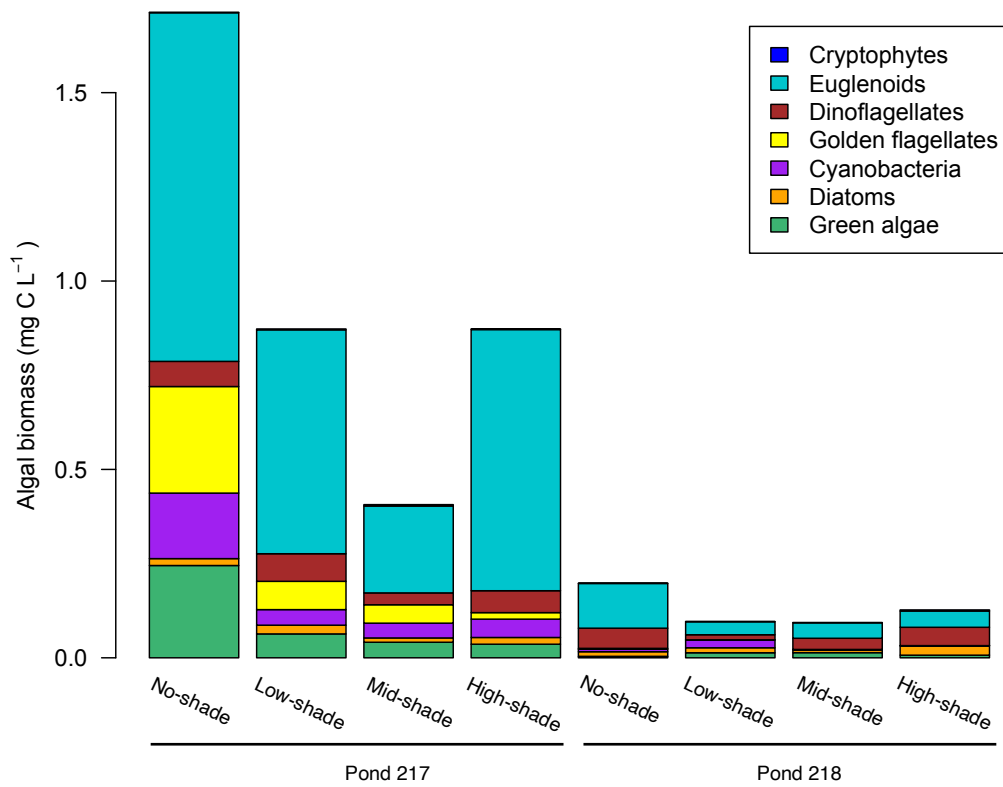

**Supplementary Figure 6.** Mean biomasses of phytoplankton taxa during the experimental run in the no-shade, low-shade, mid-shade, and high-shade sections of pond 217 and pond 218.

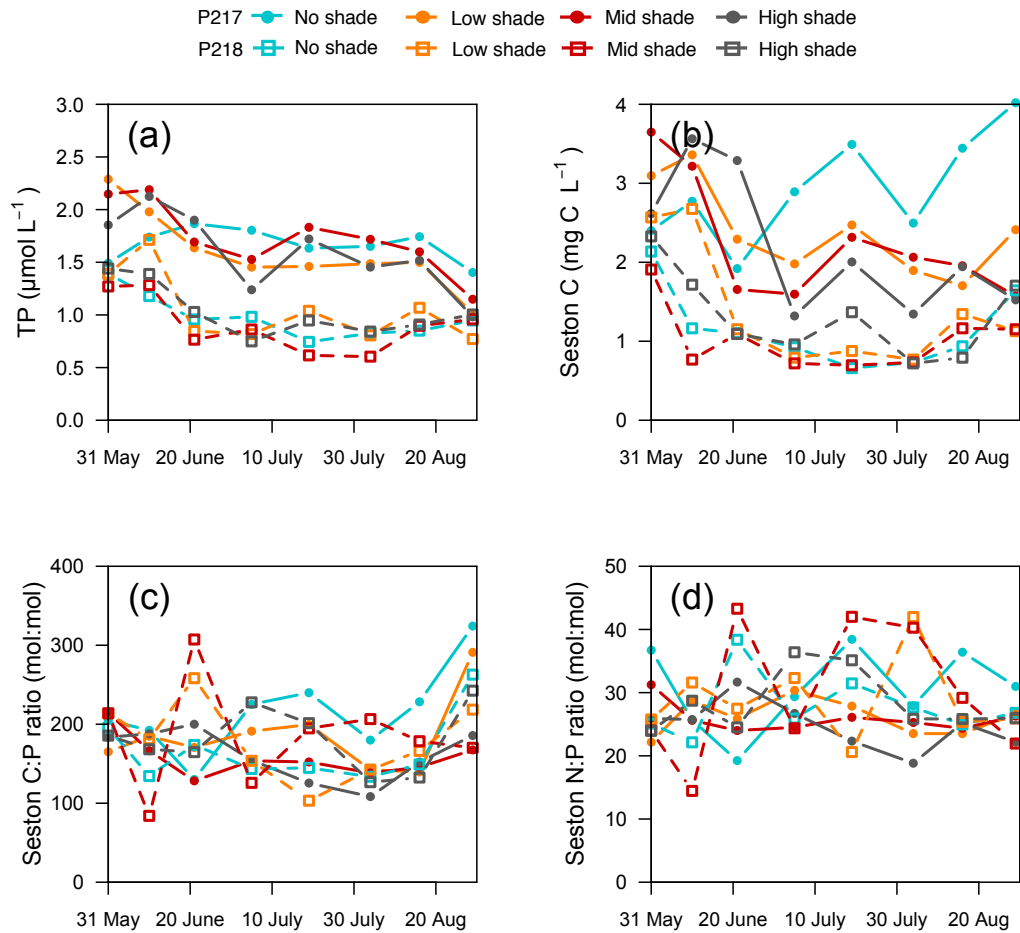

**Supplementary Figure 7.** Temporal changes in total phosphorus concentration (a), seston carbon (b) seston C:P ratio (c) and seston N:P ratio (d) in the water column of no-shade (blue), low-shade (orange), mid-shade (red), and high-shade sections (gray) of pond 217 (circle and solid line) and pond 218 (square and dashed line).



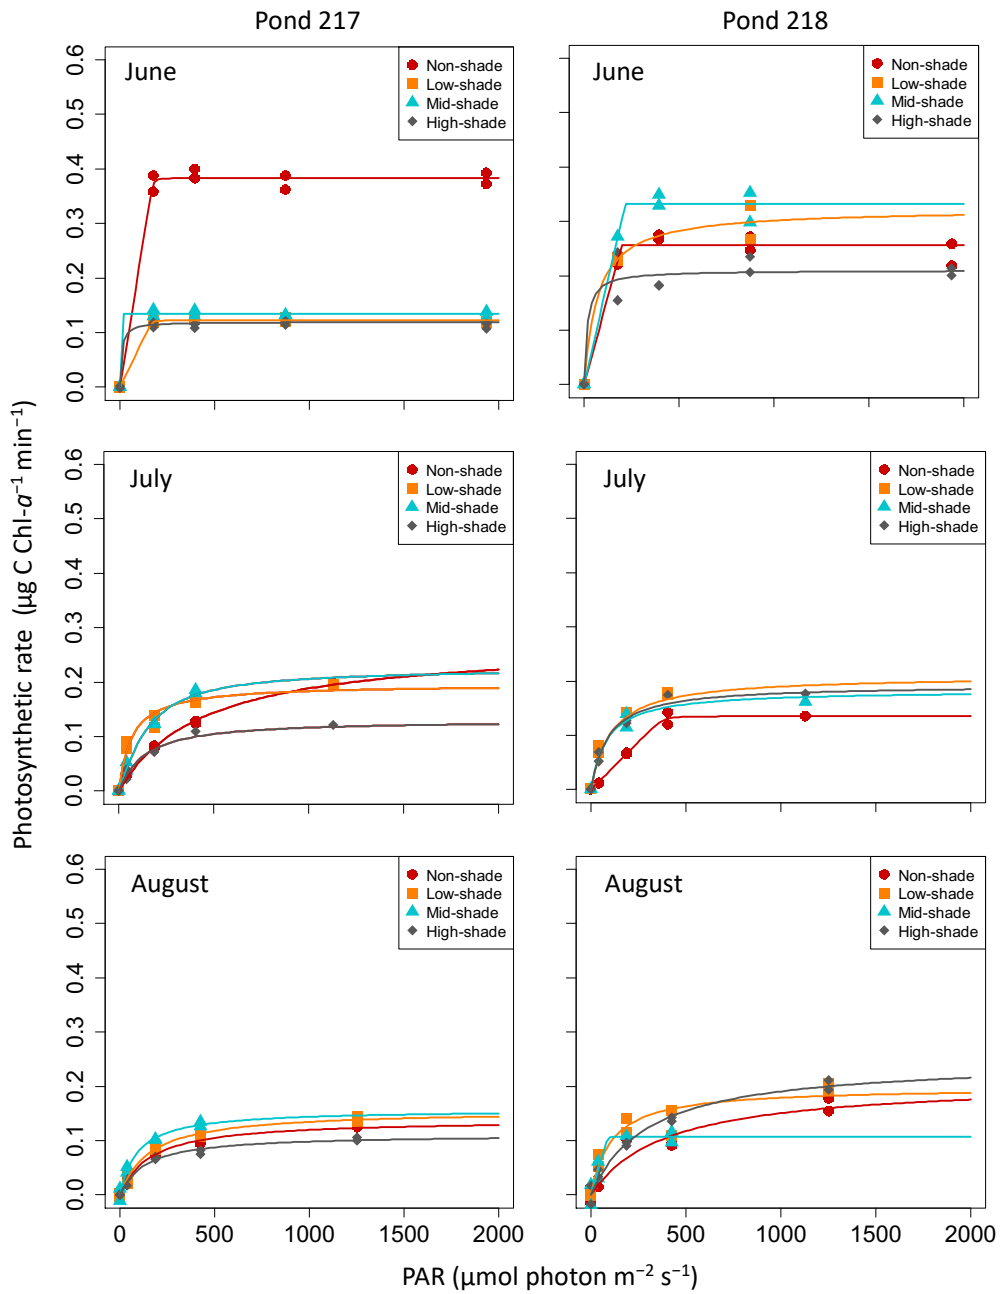

**Supplementary Figure 8.** Chlorophyll-*a* specific photosynthetic rates plotted against the mean PAR in June 14 (blue), July 11 (red), and August 22 (gray) in the no-shade, low-shade, mid-shade, and high-shade sections of pond 217 (upper) and 218 (lower). Each response curve was obtained by fitting data to non-rectangular hyperbola models.

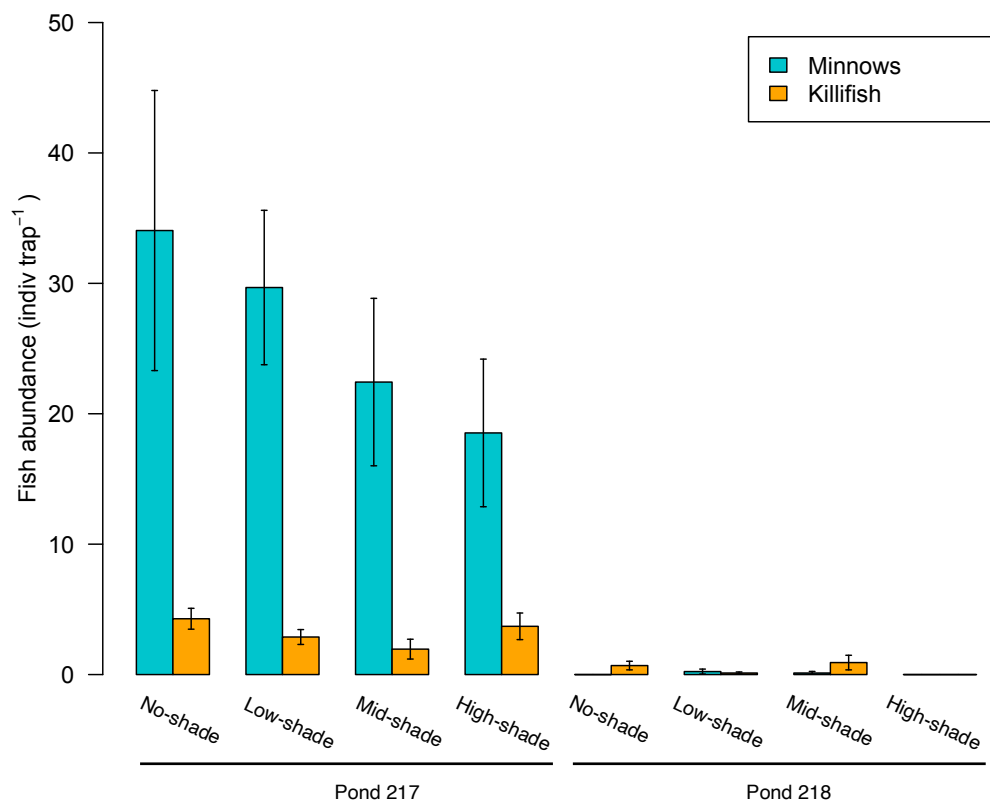

**Supplementary Figure 9.** Mean abundance of fish taxa during the experimental run in the no-shade, low-shade, mid-shade, and high-shade sections of pond 217 and pond 218. Vertical bars denote SE on the mean ( $n = 7$  sampling dates).

**Supplementary Table 1.** Model variables.

| Variable        | Unit                                              | Definition                                                               | Convert equation                          |
|-----------------|---------------------------------------------------|--------------------------------------------------------------------------|-------------------------------------------|
| $P$             | gC m <sup>-2</sup>                                | Producer biomass                                                         |                                           |
| $H$             | gC m <sup>-2</sup>                                | Herbivore biomass                                                        |                                           |
| $g$ or $f(P)$   | gC gC <sup>-1</sup> d <sup>-1</sup>               | Biomass-specific production rate                                         | $q_3 \times \mu^{\varepsilon_3}$          |
| $x$             | gC gC <sup>-1</sup> d <sup>-1</sup>               | Biomass-specific loss rate of producers other than grazing loss          |                                           |
| $k$             | 0 ~ 1                                             | Efficiency of ingested producer biomass converted into herbivore biomass | $q_1 \times \alpha_{nut}^{\varepsilon_1}$ |
| $f$ or $f(P)$   | m <sup>2</sup> gC <sup>-1</sup> d <sup>-1</sup>   | Per capita grazing rate of herbivores                                    |                                           |
| $m$             | gC gC <sup>-1</sup> d <sup>-1</sup>               | Per capita mortality rate of herbivores                                  | $q_4 \times \theta^{\varepsilon_4}$       |
| $\beta$         | 0~1                                               | Fraction of primary production that herbivores consumed                  | $q_2 \times \alpha_{edi}^{\varepsilon_2}$ |
| $\mu$           | gC mg chl- <i>a</i> <sup>-1</sup> d <sup>-1</sup> | Chl- <i>a</i> specific growth rate of producers                          |                                           |
| $\alpha_{nut}$  | dimension less                                    | Carbon to phosphorus ratio of producers                                  |                                           |
| $\alpha_{edi}$  | 0 ~ 1                                             | A trait value of primary producers determining edibility                 |                                           |
| $\theta$        | CPUE                                              | Abundance of carnivores                                                  |                                           |
| $q_1$           | dimension less                                    | Conversion factor for adjusting to biomass unit.                         |                                           |
| $q_2$           | 0 ~ 1                                             | A factor for converting the trait to edible efficiency                   |                                           |
| $q_3$           | mg chl- <i>a</i> gC <sup>-1</sup>                 | Conversion factor for adjusting to biomass unit.                         |                                           |
| $q_4$           | gC CPUE <sup>-1</sup>                             | Specific predation rate                                                  |                                           |
| $\varepsilon_1$ |                                                   | Effectiveness of the carbon to phosphorus ratio                          |                                           |
| $\varepsilon_2$ |                                                   | Effectiveness of the edibility                                           |                                           |
| $\varepsilon_3$ |                                                   | Effectiveness of the specific growth rate                                |                                           |
| $\varepsilon_4$ |                                                   | Effectiveness of the carnivore abundance                                 |                                           |
| $\gamma$        |                                                   | $\log(q_1) + \log(q_2) + \log(q_3) - \log(q_4)$                          |                                           |

**Supplementary Table 2.** Temporal means and standard errors (parenthesis) of plankton biomass, primary production rate, fish abundance, and seston elemental ratios in each treatment of pond 217 and 218 during the experiment.

| Pond | Treatment  | H/P mass ratio      | Zooplankton Biomass  | Algal Biovolume                                   | Algal Biomass        |
|------|------------|---------------------|----------------------|---------------------------------------------------|----------------------|
|      |            | gC gC <sup>-1</sup> | µg C L <sup>-1</sup> | x10 <sup>6</sup> µm <sup>3</sup> mL <sup>-1</sup> | mg C L <sup>-1</sup> |
| 217  | No shade   | 0.126 (0.049)       | 148.9 (34.1)         | 14.146 (2.676)                                    | 1.713 (0.320)        |
| 217  | Low shade  | 0.112 (0.019)       | 91.3 (23.8)          | 6.819 (1.549)                                     | 0.873 (0.200)        |
| 217  | Mid shade  | 0.781 (0.155)       | 248.9 (43.5)         | 3.361 (0.728)                                     | 0.407 (0.097)        |
| 217  | High shade | 0.296 (0.122)       | 149.1 (39.5)         | 6.510 (1.961)                                     | 0.873 (0.267)        |
| 218  | No shade   | 1.617 (0.639)       | 130.8 (23.8)         | 1.543 (0.382)                                     | 0.132 (0.024)        |
| 218  | Low shade  | 1.009 (0.296)       | 100.3 (22.8)         | 0.891 (0.255)                                     | 0.164 (0.057)        |
| 218  | Mid shade  | 1.927 (0.716)       | 118.3 (24.2)         | 0.716 (0.168)                                     | 0.094 (0.023)        |
| 218  | High shade | 1.804 (0.475)       | 149.3 (36.6)         | 0.884 (0.383)                                     | 0.127 (0.047)        |

| Pond | Treatment  | Fraction of edible algae |               |                                            |                                    |
|------|------------|--------------------------|---------------|--------------------------------------------|------------------------------------|
|      |            | Chlorophyll-a            |               | Specific Daily Production                  | Daily Production                   |
|      |            | mg chl-a m <sup>-2</sup> |               | mgC mg chl-a <sup>-1</sup> d <sup>-1</sup> | gC m <sup>-2</sup> d <sup>-1</sup> |
| 217  | No shade   | 25.51 (5.00)             | 0.525 (0.198) | 108.1 (37.3)                               | 1.989 (0.465)                      |
| 217  | Low shade  | 21.15 (3.32)             | 0.637 (0.241) | 50.3 (6.4)                                 | 1.092 (0.242)                      |
| 217  | Mid shade  | 18.57 (4.53)             | 0.406 (0.153) | 59.3 (16.2)                                | 0.796 (0.153)                      |
| 217  | High shade | 22.41 (4.43)             | 0.676 (0.255) | 34.5 (9.8)                                 | 0.858 (0.316)                      |
| 218  | No shade   | 4.02 (0.54)              | 0.460 (0.174) | 81.7 (23.5)                                | 0.334 (0.108)                      |
| 218  | Low shade  | 3.62 (0.99)              | 0.263 (0.099) | 84.2 (14.4)                                | 0.267 (0.052)                      |
| 218  | Mid shade  | 2.93 (0.31)              | 0.669 (0.253) | 72.9 (15.1)                                | 0.202 (0.038)                      |
| 218  | High shade | 3.93 (0.77)              | 0.444 (0.168) | 56.1 (17.5)                                | 0.280 (0.128)                      |

| Pond | Treatment  | Fish abundance                 | Seston C             | Seston C:P ratio      | Seston N:P ratio      |
|------|------------|--------------------------------|----------------------|-----------------------|-----------------------|
|      |            | CPUE (gWW trap <sup>-1</sup> ) | µmol L <sup>-1</sup> | mol mol <sup>-1</sup> | mol mol <sup>-1</sup> |
| 217  | No shade   | 14.03 (4.00)                   | 250 (22)             | 217.14 (22.78)        | 29.7 (2.45)           |
| 217  | Low shade  | 6.93 (1.80)                    | 192 (17)             | 188.44 (19.21)        | 26.7 (0.97)           |
| 217  | Mid shade  | 7.27 (2.24)                    | 171 (18)             | 150.29 (5.40)         | 25.2 (0.34)           |
| 217  | High shade | 5.39 (1.49)                    | 178 (29)             | 159.16 (12.89)        | 24.7 (1.55)           |
| 218  | No shade   | 0.68 (0.68)                    | 85 (10)              | 163.11 (17.37)        | 28.2 (2.00)           |
| 218  | Low shade  | 0.28 (0.28)                    | 104 (21)             | 174.79 (19.27)        | 29.3 (2.59)           |
| 218  | Mid shade  | 0.52 (0.52)                    | 75 (7)               | 181.01 (26.44)        | 30.8 (4.26)           |
| 218  | High shade | 0.00 (0.00)                    | 99 (13)              | 180.53 (16.98)        | 28.9 (1.84)           |

**Supplementary Table 3.** Results of generalized linear models with the five lowest Akaike's Information Criterion values. Parameter meanings are shown in Table. S1.

| Model                                                                                             | AIC   |
|---------------------------------------------------------------------------------------------------|-------|
| $\log(H/P) \sim \log(\alpha_{\text{nut}}) + \log(\alpha_{\text{edi}}) + \log(\mu) + \log(\theta)$ | 12.20 |
| $\log(H/P) \sim \log(\alpha_{\text{nut}}) + \log(\mu) + \log(\theta)$                             | 16.07 |
| $\log(H/P) \sim \log(\alpha_{\text{nut}}) + \log(\alpha_{\text{edi}}) + \log(\theta)$             | 20.55 |
| $\log(H/P) \sim \log(\alpha_{\text{edi}}) + \log(\mu) + \log(\theta)$                             | 24.58 |
| $\log(H/P) \sim \log(\alpha_{\text{nut}}) + \log(\alpha_{\text{edi}}) + \log(\mu)$                | 29.10 |
